# Supplementary material
Source: Research Square preprint supplement (doi:10.21203/rs.3.rs-6973384/v1)
Supplement: Supplementary file 1 [file aff5f430247aefcd5472b78f.docx]

**Supplementary Table 1. Distribution of knowledge dimension responses.**

| Knowledge dimension items | N (%) | | |
| --- | --- | --- | --- |
| Very familiar | Heard of | Unclear |
| 1. Prostate cancer is a malignant tumor that occurs in the prostate epithelium and is the most common malignancy of the male genitourinary system. | 170 (35.94%) | 275(58.14%) | 28(5.92%) |
| 2. The progression of prostate cancer is very slow, and most people show no obvious symptoms in the early stages. | 136(28.75%) | 290(61.31%) | 47(9.94%) |
| 3. The causative factors are currently unclear, but it is known to be related to age, genetics, obesity, sex hormones, environment, and diet. | 188(39.75%) | 236(49.89%) | 49(10.36%) |
| 4. As the tumor grows, prostate cancer may cause lower urinary tract obstruction symptoms such as frequent urination, urgency, slow urine flow, difficulty urinating, and even urinary retention or incontinence. | 156(32.98%) | 258(54.55%) | 59(12.47%) |
| 5. When bone metastasis occurs, symptoms such as bone pain, spinal cord compression, and pathological fractures may arise. | 148(31.29%) | 226(47.78%) | 99(20.93%) |
| 6. Prostate-specific antigen (PSA) testing combined with digital rectal examination helps in early-stage detection. | 143(30.23%) | 236(49.89%) | 94(19.87%) |
| 7. If abnormalities are found through prostate-specific antigen testing or digital rectal examination, further confirmation is needed through ultrasound and biopsy. | 148(31.29%) | 242(51.16%) | 83(17.55%) |
| 8. If the biopsy confirms the presence of cancer, imaging examinations can further determine the grade and extent of metastasis. | 152(32.14%) | 233(49.26%) | 88(18.60%) |
| 9. Early-stage prostate cancer can be clinically cured through radical surgery or radical radiotherapy, while metastatic prostate cancer requires androgen deprivation therapy. | 143(30.23%) | 235(49.68%) | 95(20.08%) |

**Supplementary Table 2. Distribution of attitude dimension responses.**

| Attitude dimension items | N (%) | | | | |
| --- | --- | --- | --- | --- | --- |
| Strongly agree | Agree | Neutral | Disagree | Strongly disagree |
| 1. You believe that understanding knowledge related to prostate cancer is very important for yourself. | 212(44.82%) | 224(47.36%) | 34(7.19%) | 3(0.63%) |  |
| 2. You are worried about developing prostate cancer. | 124(26.7%) | 209 (44.19%) | 101 (21.35%) | 33 (6.98%) | 6 (1.27%) |
| 3. You are willing to undergo regular prostate cancer screenings even if you have no symptoms. | 183 (36.02%) | 198 (38.98%) | 74 (14.57%) | 31 (6.10%) | 22 (4.33%) |
| 4. You believe that the cost of prostate cancer screening is within the family's financial affordability. | 134 (28.33%) | 243 (51.37%) | 76 (16.07%) | 1 (0.21%) |  |
| 5. You believe that prostate cancer has a high possibility of being cured. | 157 (33.19%) | 217 (45.88%) | 80 (16.91%) | 18 (3.81%) | 1 (0.21%) |
| 6. You are concerned that prostate cancer treatment may bring serious side effects. | 107 (22.62%) | 160 (33.83%) | 128 (27.06%) | 58(12.26%) | 20 (4.23%) |
| 7. You think that community health service centers and related medical institutions should strengthen health education on prostate cancer. | 176(37.21%) | 247(52.22%) | 43(9.09%) | 7(1.48%) |  |
| 8. You believe that prostate cancer patients should receive more social support. | 218(46.09%) | 204(43.13%) | 44(9.30%) | 6(1.27%) | 1(0.21%) |
| 9. You believe that maintaining a healthy lifestyle (such as a balanced diet and regular exercise) is very important for the prevention of prostate cancer. | 212(44.82%) | 214(45.24%) | 38(8.03%) | 5(1.06%) | 4(0.85%) |

**Supplementary Table 3. Distribution of practice dimension response.**

| Practice dimension items | N (%) | | | | |
| --- | --- | --- | --- | --- | --- |
| Always | Often | Occasionally | Rarely | Never |
| 1. In the past year, how often have you actively sought out information related to prostate cancer ? | 114 (24.10%) | 190 (40.17%) | 123 (26.00%) | 39 (8.29%) | 7 (1.48%) |
| 2. Do you pay attention to your urination status, such as symptoms of frequent urination or urgency ? | 110 (23.26%) | 185 (39.11%) | 139 (29.39%) | 34 (7.19%) | 5 (1.06%) |
| 3. How often do you undergo regular physical examinations (including prostate-related examinations) as recommended by your doctor ? | 100 (21.14%) | 214 (45.24%) | 104 (21.99%) | 46 (9.73%) | 9 (1.90%) |
| 4. Do you have the habit of maintaining moderate exercise (such as exercising at least 3 times a week for more than 30 minutes each time) ? | 115(24.31%) | 187(39.53%) | 122(25.79%) | 44(9.30%) | 5(1.06%) |
| 5. If diagnosed with prostate cancer, would you actively cooperate with treatment ? | 210(44.40%) | 199(42.07%) | 48(10.15%) | 15(3.17%) | 1(0.21%) |
| 6. Are you willing to change unhealthy lifestyles to prevent prostate cancer ? | 221(46.72%) | 178(37.63%) | 59(12.47%) | 11(2.33%) | 4(0.85%) |
| 7. Are you willing to promote knowledge about the prevention and treatment of prostate cancer to your family and friends ? | 154(32.56%) | 219(46.30%) | 71(15.01%) | 19(4.02%) | 10(2.11%) |
| 8. Are you willing to participate in community-organized lectures on the prevention and treatment of prostate cancer ? | 151(31.92%) | 199(42.07%) | 86(18.18%) | 30(6.34%) | 7(1.48%) |

**Supplementary table 4. SEM fit indicators.**

| Model | Ref. | Measured results |
| --- | --- | --- |
| CMIN/DF | 1-3 excellent，3-5 good | 4.249 |
| RMSEA | <0.08 good | 0.067 |
| IFI | >0.8 good | 0.888 |
| TLI | >0.8 good | 0.787 |
| CFI | >0.8 good | 0.880 |

**Supplementary table 5. SEM total effect estimates.**

| Variables | Direction | Dimensions | Estimate | S.E. | C.R. | P |
| --- | --- | --- | --- | --- | --- | --- |
| Attitude | <--- | Knowledge | .481 | .077 | 6.276 | *** |
| Practice | <--- | Knowledge | .540 | .100 | 5.400 | *** |
| Practice | <--- | Attitude | 1.031 | .165 | 6.234 | *** |
| K1 | <--- | Knowledge | 1.000 |  |  |  |
| K2 | <--- | Knowledge | .903 | .093 | 9.725 | *** |
| K3 | <--- | Knowledge | 1.037 | .102 | 10.167 | *** |
| K4 | <--- | Knowledge | 1.166 | .105 | 11.151 | *** |
| K5 | <--- | Knowledge | 1.252 | .115 | 10.849 | *** |
| K6 | <--- | Knowledge | 1.237 | .113 | 10.928 | *** |
| K7 | <--- | Knowledge | 1.231 | .111 | 11.067 | *** |
| K8 | <--- | Knowledge | 1.164 | .112 | 10.434 | *** |
| K9 | <--- | Knowledge | 1.255 | .114 | 11.027 | *** |
| A9 | <--- | Attitude | 1.000 |  |  |  |
| A8 | <--- | Attitude | 1.113 | .160 | 6.965 | *** |
| A7 | <--- | Attitude | -1.155 | .159 | -7.285 | *** |
| A6 | <--- | Attitude | -.796 | .194 | -4.103 | *** |
| A5 | <--- | Attitude | 1.083 | .170 | 6.365 | *** |
| A4 | <--- | Attitude | -1.236 | .177 | -6.984 | *** |
| A3 | <--- | Attitude | 1.355 | .180 | 7.517 | *** |
| A2 | <--- | Attitude | 1.034 | .181 | 5.704 | *** |
| A1 | <--- | Attitude | .948 | .140 | 6.764 | *** |
| P1 | <--- | Practice | 1.000 |  |  |  |
| P2 | <--- | Practice | 1.105 | .103 | 10.738 | *** |
| P3 | <--- | Practice | 1.130 | .106 | 10.614 | *** |
| P4 | <--- | Practice | .883 | .099 | 8.927 | *** |
| P5 | <--- | Practice | .497 | .076 | 6.529 | *** |
| P6 | <--- | Practice | .622 | .082 | 7.550 | *** |
| P7 | <--- | Practice | .980 | .098 | 10.014 | *** |
| P8 | <--- | Practice | 1.042 | .102 | 10.189 | *** |
